# Supplementary material
Source: publisher figshare collection journal article supplement (https://karger.figshare.com/ndownloader/files/25029164)
Supplement: Supplementary file 1 [file 25029164]

Supplementary table 2. Association between mucosal pattern and the use of PPI.

|  | Mucosal pattern | | | *P* value |
| --- | --- | --- | --- | --- |
| Regular  n = 11 | Irregular  n = 24 | Absent  n = 90 |
| Proton pump inhibitor  Present  Absent | 2 (18)  9 (82) | 8 (33)  16 (67) | 22 (24)  68 (76) | 0.625 |

Data are presented as *n* (%).
